# Supplementary material for: Intercalation and in situ polymerization of poly(alkylene oxide) derivatives within M+-montmorillonite (M = Li, Na, K)
Source: Royal Society of Chemistry journal article supplement (doi:10.1039/b505217c), 2006-01-01
Supplement: b505217c2.pdf [file b505217c2.pdf]

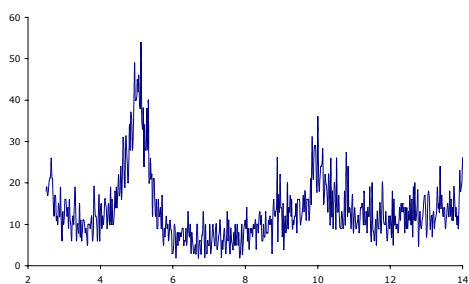

(a)

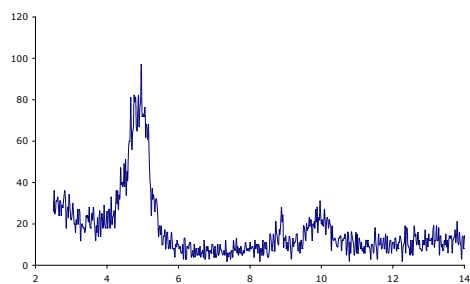

(b)

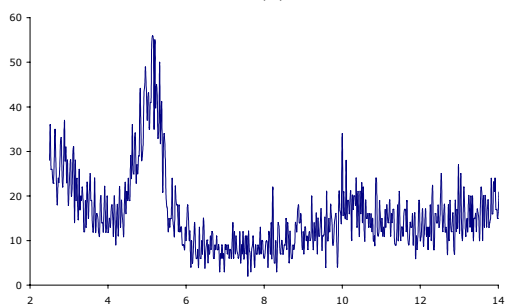

(c)

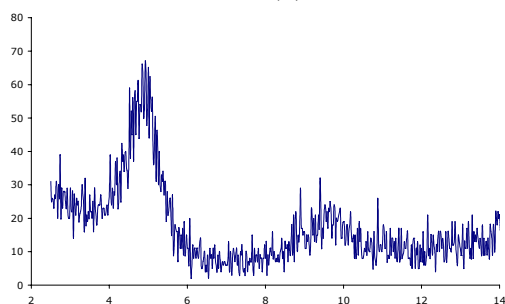

(d)

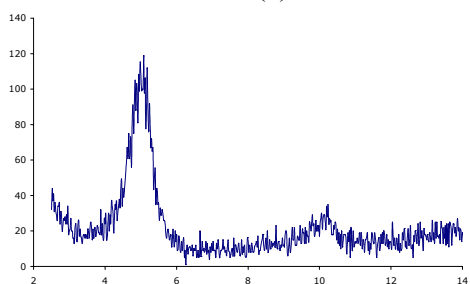

(e)

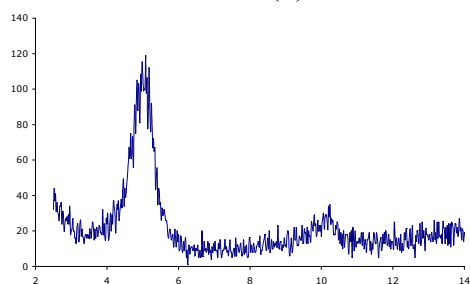

(f)

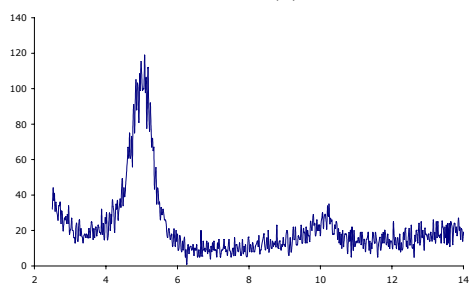

(g)

**ESI 5.** Powder X-ray diffraction patterns for poly(ethylene oxide) based Li-Mmt clay-polymer nanocomposites (a) PEG, (b) PEO-DiGly, (c) PEO-DiAc, (d) PEO-MAc, (e) PEO-DiMac, (f) PEO-MMac and (g) PEO-Meac

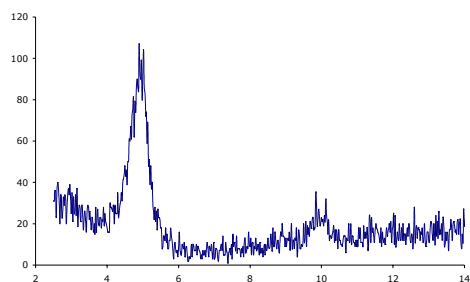

(a)

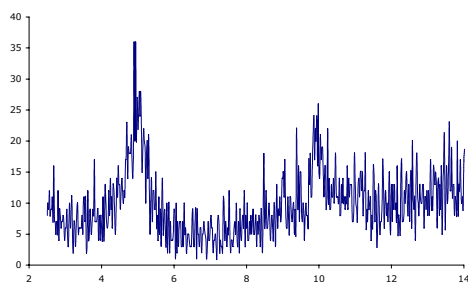

(b)

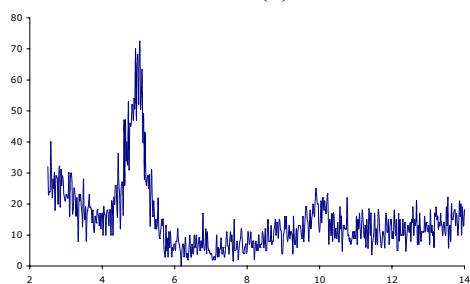

(c)

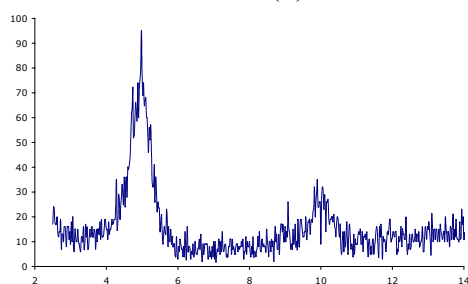

(d)

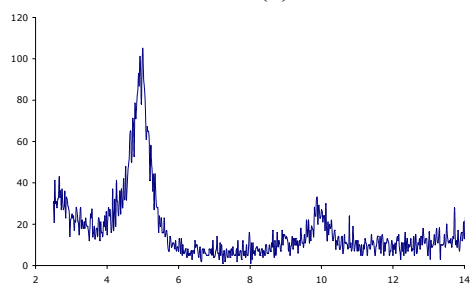

(e)

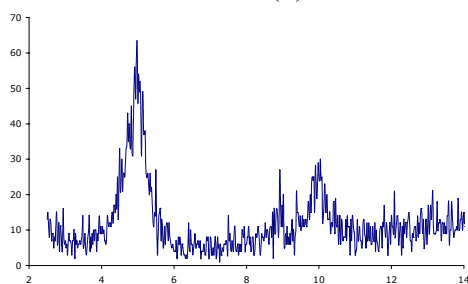

(f)

**ESI 6.** Powder X-ray diffraction patterns for poly(propylene oxide) based Li-Mmt clay-polymer nanocomposites (a) PPG, (b) PPO-DiGly, (c) PPO-DiAc, (d) PPO-MAc, (e) PPO-DiMac and (f) PPO-MMac

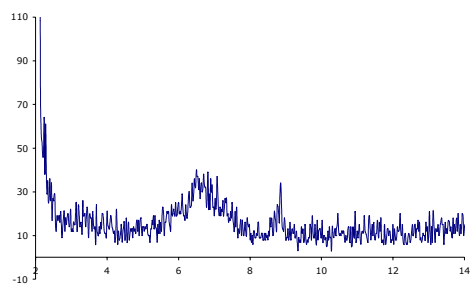

(a)

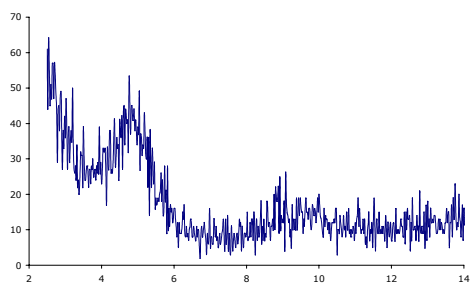

(b)

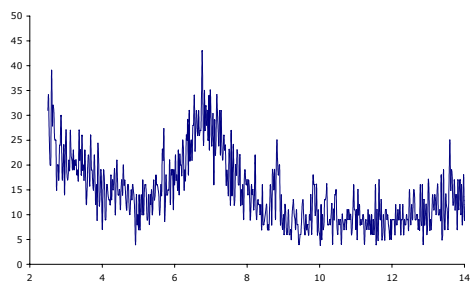

(c)

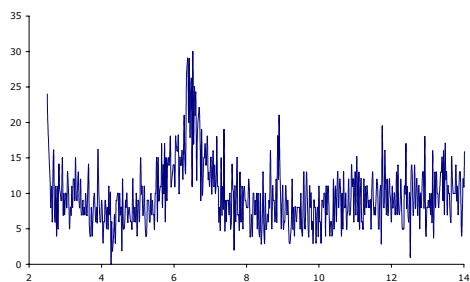

(d)

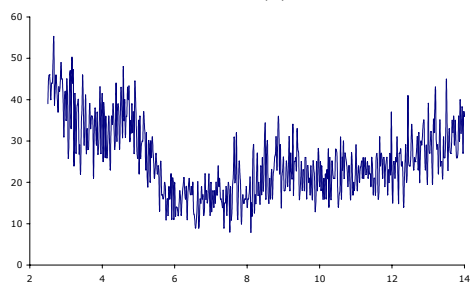

(e)

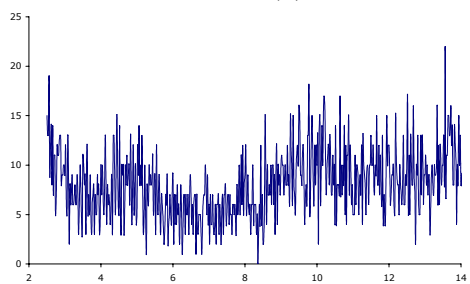

(f)

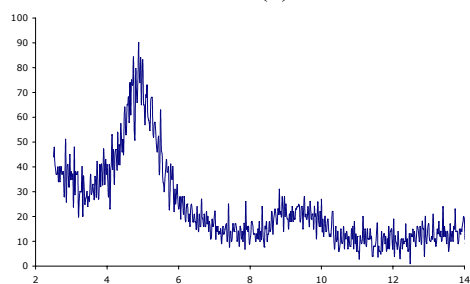

(g)

**ESI 7.** Powder X-ray diffraction patterns for poly(ethylene oxide) based K-Mmt clay-polymer nanocomposites (a) PEG, (b) PEO-DiGly, (c) PEO-DiAc, (d) PEO-MAc, (e) PEO-DiMac, (f) PEO-MMac and (g) PEO-Meac

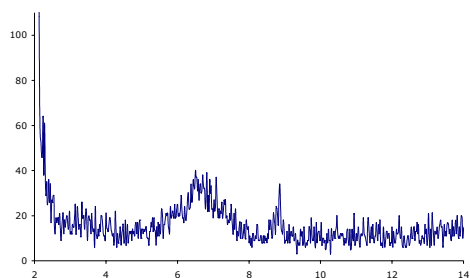

(a)

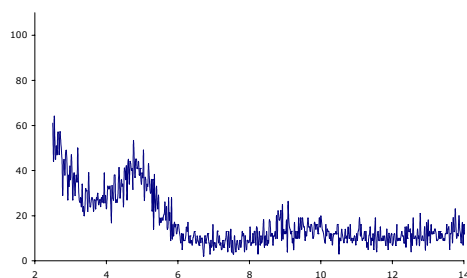

(b)

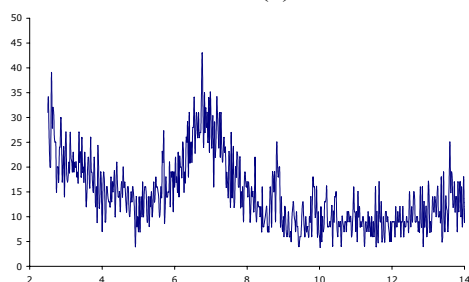

(c)

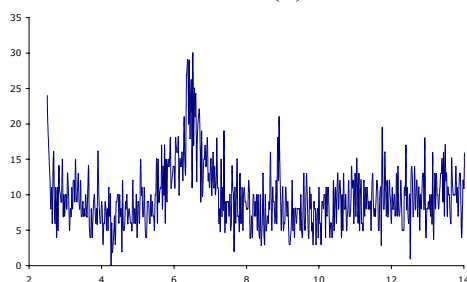

(d)

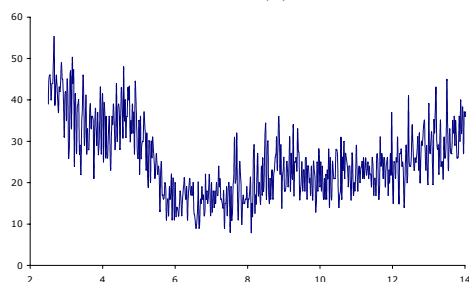

(e)

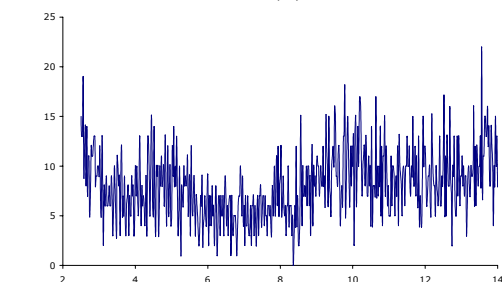

(f)

**ESI 8.** Powder X-ray diffraction patterns for poly(ethylene oxide) based K-Mmt clay-polymer nanocomposites (a) PPG, (b) PPO-DiGly, (c) PPO-DiAc, (d) PPO-MAc, (e) PPO-DiMac and (f) PPO-MMac
